# Supplementary material for: Evaluating Time to Treatment Intensification Among Drug Naïve Type 2 Diabetes Patients: A Comparison of Initial Combination Therapy vs. Step-therapy Approaches
Source: Research Square preprint supplement (doi:10.21203/rs.3.rs-6900372/v1), 2025-07-02
Supplement: Supplementary file 1 [file bd9078a0b097bf6467b2980b.docx]

**Supplementary data**

**Table S1** ICD-10 codes

| **Diagnosis** | **ICD-10 code** |
| --- | --- |
| Type 2 diabetes | E11 |
| CAD | I25 |
| MI | I21, I22, I23 |
| Stroke | I63 |
| CKD | N18 |
| Dementia | F01, F02, F03 |
| Depression | F32, F33 |
| HF | I50 |
| Hyperlipidemia | E78 |
| Hypertension | I10-I13 |
| Obesity | E66 |
| Pregnancy | Z33, Z34 |
| Gestational diabetes | O24 |
| Secondary diabetes | E08-E09, E13 |
| Type 1 diabetes | E10 |
| Polycystic ovarian syndrome | E282 |
| Organ transplant | Z482 |
| End-stage renal disease | N186 |
| HIV/AIDS | B20 |
| Malignancy | C00-C14, C15-C26, C30-C39, C40-C41, C43-C44, C45-C49, C50-C50, C51-C58, C60-C63, C64-C68, C69-C72, C73-C75, C76-C80, C7A-C7A, C81-C96 |
